# The role of ubiquitylation and degradation in RhoGTPase signalling

Micha Nethe\* and Peter L. Hordijk

Department of Molecular Cell Biology, Sanquin Research and Landsteiner Laboratory, Academic Medical Center, University of Amsterdam, Plesmanlaan 125, 1066 CX Amsterdam, The Netherlands

\*Author for correspondence ([m.nethe@sanquin.nl](mailto:m.nethe@sanquin.nl))

*Journal of Cell Science* 123, 4011–4018

© 2010. Published by The Company of Biologists Ltd

doi:10.1242/jcs.078360

## Summary

Rho-like guanosine triphosphatases (RhoGTPases) control many aspects of cellular physiology through their effects on the actin cytoskeleton and on gene transcription. Signalling by RhoGTPases is tightly coordinated and requires a series of regulatory proteins, including guanine-nucleotide exchange factors (GEFs), GTPase-activating proteins (GAPs) and guanine-nucleotide dissociation inhibitors (GDIs). GEFs and GAPs regulate GTPase cycling between the active (GTP-bound) and inactive (GDP-bound) states, whereas GDI is a cytosolic chaperone that binds inactive RhoGTPases. Like many other proteins, RhoGTPases are subject to degradation following the covalent conjugation of ubiquitin. There have been increasing indications that ubiquitylation of small GTPases occurs in a regulated fashion, primarily upon activation, and is an important means to control signalling output. Recent work has identified cellular proteins that control RasGTPase and RhoGTPase ubiquitylation and degradation, allowing us to amend the canonical model for GTPase (in)activation. Moreover, accumulating evidence for indirect regulation of GTPase function through the ubiquitylation of GTPase regulators makes this post-translational modification a key feature of GTPase-dependent signalling pathways. Here, we will discuss these recent insights into the regulation of RhoGTPase ubiquitylation and their relevance for cell signalling.

**Key words:** RhoGTPase signalling, Ubiquitin–Proteasome System, Ubiquitylation

## Introduction

RhoGTPases are members of the Ras GTPase superfamily and are key regulators of the cellular cytoskeleton. They control cell adhesion, migration, gene transcription and cell division (Bosco et al., 2009; Didsbury et al., 1989; Hall, 1990; Kozma et al., 1997; Ridley et al., 1992; Ridley and Hall, 1992). Although the 22 different RhoGTPases show very high sequence homology, they have unique biological effects (Bishop and Hall, 2000; Bosco et al., 2009; van Aelst and D'Souza-Schorey, 1997). In polarised, migrating cells, RhoA stimulates myosin-based contractility of the actin cytoskeleton, which drives retraction of the rear of the cell (Alblas et al., 2001; Worthylake and Burridge, 2001). Cdc42 and Rac1 promote actin polymerisation, resulting in the formation of either lamellipodia (Rac1) or filopodia (Cdc42) through activation of the Arp2/3 complex; this drives cell protrusion at the leading edge of a migrating cell (Insall and Machesky, 2009).

Most RhoGTPases act as molecular switches, cycling between a GDP- and a GTP-bound state (Fig. 1) (Bishop and Hall, 2000; Bosco et al., 2009; Rossman et al., 2005; van Aelst and D'Souza-Schorey, 1997). Binding of GTP induces a conformational change, which allows the binding and subsequent activation of effector proteins (Didsbury et al., 1989; Hall, 1990; Kozma et al., 1997; Ridley et al., 1992; Ridley and Hall, 1992). Intrinsic GTP hydrolysis then reverts the GTPase to its inactive GDP-bound conformation (Didsbury et al., 1989; Hall, 1990; Kozma et al., 1997; Ridley et al., 1992; Ridley and Hall, 1992). Guanine-nucleotide exchange factors (GEFs) catalyse the exchange of GDP for GTP, thus activating the RhoGTPase. By contrast, GTPase-activating proteins (GAPs) promote the intrinsic GTPase activity. Finally, RhoGTPases can associate with cytosolic chaperone proteins known as guanine-nucleotide dissociation

inhibitors (GDIs), which maintain the GTPase in its inactive conformation (Didsbury et al., 1989; Hall, 1990).

Although the GDP-bound form is generally considered to be inactive, GDP-bound RhoGTPases can nevertheless exert signalling functions. Rac1, in complex with RhoGDI, can activate the NADPH oxidase (NOX) complex (Grizot et al., 2001). Similarly, binding of RhoGDI does not prevent the Rac1- or Cdc42-driven activation of phospholipase C- $\beta$ 2 (Illenberger et al., 1998). Likewise, RhoB, which regulates vesicle traffic (Fernandez-Borja et al., 2005; Neel et al., 2007; Wherlock et al., 2004), controls endosomal sorting in both the GDP- and GTP-bound form (Neel et al., 2007).

These findings indicate that GDP-bound RhoGTPases are signalling competent and suggest that mechanisms other than GTP hydrolysis must exist to terminate RhoGTPase signalling. Recently, conjugation to ubiquitin and, consequently, proteasomal degradation have been shown to regulate signalling by RhoGTPases such as RhoA and Rac1 (Chen et al., 2009; Kovacic et al., 2001; Lerm et al., 2002; Lynch et al., 2006; Nethe et al., 2010; Visvikis et al., 2008; Wang et al., 2003). Here, we will review recent data on the ubiquitylation of RhoGTPases that support the notion that this post-translational modification is an important aspect of GTPase regulation and signalling.

## Protein ubiquitylation in cell signalling

Protein ubiquitylation is a three-step process resulting in the covalent attachment of ubiquitin, a 76 amino acid protein, to lysine residues within target proteins. Ubiquitylation is initiated by a ubiquitin-activating enzyme (E1), which drives ATP-dependent transfer of ubiquitin to a ubiquitin-conjugating enzyme (E2). This enzyme, in conjunction with a ubiquitin protein (E3) ligase, covalently attaches the ubiquitin to the target. There are several

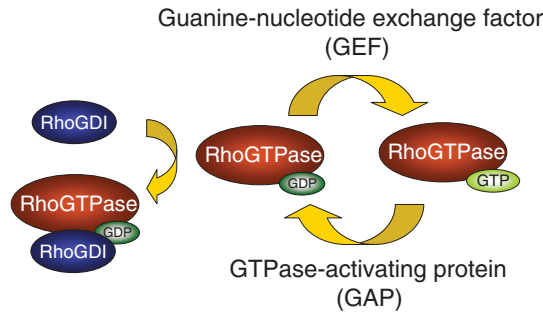

**Fig. 1. RhoGTPases cycle between a GDP- and GTP-bound state.** RhoGTPase activation is determined by the exchange of bound GDP for GTP, catalysed by GEFs. Subsequent GTP hydrolysis, promoted by GAPs, decreases RhoGTPase activity. Inactive RhoGTPases are stabilised by binding to a cytoplasmic chaperone, RhoGDI.

hundreds of proteins that, based on established activity or structural features, could serve as potential E3 ligases (Deshaies and Joazeiro, 2009). These can be divided in two superfamilies: the RING (really interesting new gene) E3 ligases and the HECT (homologous to the E6-AP carboxyl terminus) E3 ligases (see Box 1) (Rotin and Kumar, 2009).

A conjugated ubiquitin can serve as a new target for (poly-) ubiquitylation. Whereas it is generally accepted that mono-ubiquitylation drives protein internalisation from the peripheral cellular membrane, poly-ubiquitylation serves primarily as a signal for proteasomal degradation, which, in addition to the lysosomal pathway, controls protein turnover. Ubiquitin contains within its sequence seven lysine residues (K6, K11, K27, K29, K33, K48 and K63) that can be used to form various types of ubiquitin chains. K48-linked ubiquitylation is associated with proteasomal degradation, in contrast to K63-linked ubiquitylation, which plays a role in regulating protein trafficking and in DNA repair (Acconcia et al., 2009; Welchman et al., 2005; Xu et al., 2009). Ubiquitylation might also affect protein–protein interactions, enzymatic activity and subcellular localisation (Acconcia et al., 2009; Haglund et al., 2003; Holler and Dikic, 2004; Welchman et al., 2005). Conjugation by ubiquitin allows binding to proteins containing a ubiquitin-recognition motif, such as endocytic proteins Eps15 and Hrs (Polo et al., 2002). In addition, ubiquitin can also associate with a subset of SH3 domains, regions of approximately 60 amino acids that mediate protein–protein interactions (Stamenova et al., 2007). Ubiquitin conjugation is reversible; the ubiquitin moiety can be removed by ubiquitin-specific proteases (USPs) (Sowa et al., 2009).

In summary, ubiquitin conjugation is a bona fide signalling event as a consequence of its regulation of protein localisation and protein–protein interactions and its effects on expression levels. Ubiquitylation is also relevant to signalling by and regulation of the RhoGTPases, as discussed below (Chen et al., 2009; Kovacic et al., 2001; Lerm et al., 2002; Lynch et al., 2006; Nethe et al., 2010; Visvikis et al., 2008; Wang et al., 2003).

### The role of ubiquitylation in RhoGTPase signalling

Over the past two decades, Rac1, RhoA and Cdc42 have become the most extensively studied members of the RhoGTPase family. In line with this, information on GTPase ubiquitylation has been obtained primarily for these proteins (Table 1). In this section, we will discuss the available information in more detail, underscoring

### Box 1. HECT versus RING: two superfamilies of E3 ligases

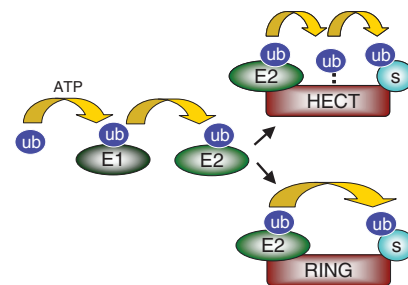

The E3 ligases can be divided into two superfamilies: the RING E3 ligases and the HECT E3 ligases (Deshaies and Joazeiro, 2009; Rotin and Kumar, 2009). The conserved HECT domain comprises ~350 amino acids and was first identified in human papilloma virus E6-associated protein (Huibregtse et al., 1995). Based on their N-terminal domains, the 28 identified human HECT E3 ligases are classified as either Nedd4 or HERC (HECT and RLD domain) family proteins, or other unrelated HECT E3 ligases. In contrast to the small HECT superfamily, 616 human genes have been identified to encode a RING motif, substantially exceeding the number of HECT E3 ligases (Li et al., 2008). The RING domain is characterised by conserved cysteine and histidine residues, which maintain the three-dimensional RING structure by supporting the binding of two zinc atoms. Numerous RING variants have been reported that can be found in multiprotein complexes, as exemplified by the class of CRLs. CRLs comprise a cullin isoform and associated subunits involved in stabilising the RING structure and driving target recognition (Deshaies and Joazeiro, 2009). RING and HECT E3 ligases can be further distinguished by the way that they transfer ubiquitin to a substrate (see Figure). The HECT domain contains a conserved catalytic cysteine, which, upon association with E2 enzymes carrying ubiquitin, initiates a thioester bond with the ubiquitin C terminus. This facilitates the subsequent transfer of ubiquitin to a substrate (S). By contrast, RING E3 ligases act as a platform that scaffolds E2 enzymes and subsequent substrates, catalysing the direct transfer of ubiquitin from the E2 enzyme to the substrate, as illustrated in the Figure.

the relevance of ubiquitylation to RhoGTPase regulation and signalling, and supporting the notion that ubiquitylation represents an additional means of crosstalk between different RhoGTPases.

### RacGTPases

The first evidence for proteasome-mediated downregulation of the RacGTPases came from analysis of Rac1-stimulated activation of NOX, which leads to the production of reactive oxygen species (ROS) (Kovacic et al., 2001). Inhibition of NOX activity revealed an unexpected proteasome-dependent increase in ectopically expressed, active Rac1 (Val12) protein expression, but not in inactive Rac1 (Asn17) (Kovacic et al., 2001). As Rac1 acts upstream of NOX, this suggests that the production of ROS triggers a proteasome-dependent negative feedback loop that mediates Rac1 degradation and thus blocks Rac1 signalling.

Inhibition of Rac1 by ubiquitin–proteasome system (UPS)-mediated degradation also occurs during the onset of the epithelial–mesenchymal transition (EMT) (Lynch et al., 2006). EMT is marked by the disassembly of cell–cell contacts and increased cell motility (Perez-Moreno et al., 2003). Because Rac1 activation

stimulates the formation of epithelial junctions, its activity needs to be downregulated during EMT (Hordijk et al., 1997; Palamidessi et al., 2008). A transient decrease in Rac1 activity was indeed shown in Madin-Darby canine kidney (MDCK) cells. Unexpectedly, this decrease was accompanied by a reduction in Rac1 protein levels, in addition to Rac1 inactivation (Lynch et al., 2006). Inhibition of the proteasome impaired the hepatocyte-growth-factor-induced decrease in Rac1 protein levels and inhibited EMT. This indicates that, during EMT, Rac1 signalling is silenced by UPS-mediated degradation, either in addition to or instead of its inactivation by a RacGAP. This notion is further supported by our own studies on the regulation of Rac1 expression levels by the membrane-associated adaptor caveolin-1 (Cav1) (Nethe et al., 2010) (see below).

Cytotoxic necrotising factor 1 (CNF1) from *Escherichia coli* has been an important tool in the analysis of Rac1 degradation. CNF1 deaminates Rac1 at Gln61, which results in constitutive association of Rac1 with GTP, thereby activating Rac1 (Lerm et al., 1999). Activation by CNF1 induces Rac1 ubiquitylation at Lys147 and its subsequent proteasomal degradation (Boyer et al., 2006; Doye et al., 2002; Lerm et al., 1999; Visvikis et al., 2008). In addition to Lys147, the polybasic hypervariable region at the C-terminal end of Rac1 is also involved in regulating its degradation (Lanning et al., 2004; Pop et al., 2004). When this region in Rac1 is replaced by that present in Rac2 or Rac3, its CNF1-induced degradation is inhibited, indicating that this domain is specifically required for Rac1 degradation (Pop et al., 2004). The Rac1 C terminus mediates specific protein-protein interactions, such as with the RacGEF  $\beta$ -PIX, Crk and CD2-associated protein (Nethe et al., 2010; ten Klooster et al., 2006; van Duijn et al., 2010; van Hennik et al., 2003; Williams, 2003). Our laboratory showed that this region also binds Cav1, an important regulator of protein internalisation and of a large number of cell signalling pathways. We further showed that Cav1 regulates Rac1 ubiquitylation and degradation (Nethe et al., 2010). Loss of Cav1 induces accumulation of non-ubiquitylated Rac1 and mono-ubiquitylated Rac1, which indicates that Cav1 selectively regulates the degradation of poly-ubiquitylated activated Rac1 (Nethe et al., 2010). These findings further suggest that mono-ubiquitylated Rac1 might have a distinct biological function as a result of its differential localisation and association with other regulatory proteins.

It is currently unclear at which subcellular location Rac1 ubiquitylation and degradation occur. Cav1 has been implicated in integrin-dependent internalisation of Rac1-containing membrane domains, which is accompanied by a loss of interactions between Rac1 and its effectors, and inhibition of Rac1-mediated signalling (del Pozo et al., 2004). As loss of Cav1 does not impair Rac1 mono-ubiquitylation, this step might occur at the plasma membrane. Similar to what has been described for RasGTPases (see Box 2), we found that an N-terminally linked ubiquitin-Rac1 fusion construct, used to mimic mono-ubiquitylated Rac1, localises prominently to endosomal structures, rather than to the plasma membrane (Fig. 2). In addition, a K147R mutant of activated Rac1, which cannot be ubiquitylated, shows enhanced accumulation at the plasma membrane (Nethe et al., 2010). Thus, it is tempting to speculate that (mono-)ubiquitylation of Rac1 drives its internalisation in a Cav1-dependent fashion. Several studies reported that proteasomal degradation of poly-ubiquitylated Rac1 occurs in the nucleus (Esufali et al., 2007; Lanning et al., 2004; Sandrock et al., 2010). Proteasomal degradation of Rac1 was inhibited when the nuclear localisation signal (NLS) found within

the Rac1 C terminus is mutated (Lanning et al., 2004; Sandrock et al., 2010) or when karyopherin- $\alpha$ 2, a nuclear import factor that has also been implicated in the nuclear translocation of Rac1, is silenced (Lanning et al., 2004; Sandrock et al., 2010). Moreover, inhibition of Wnt signalling within the nucleus correlates with an increase in K48-linked poly-ubiquitylation and stabilisation of active Rac1 in the nucleus (Esufali et al., 2007). These data indicate that Rac1 localisation and thus its degradation are regulated by Cav1 and by karyopherin- $\alpha$ 2 (Fig. 3).

The E3 ubiquitin ligase(s) that target(s) Rac1 are unknown, as is the subcellular location of Rac1 ubiquitylation. Rac1 associates with several ubiquitin ligases, including the RING-finger ligase plenty of SH3s (POSH) (Kim et al., 2006; Visvikis et al., 2008),

### Box 2. Ubiquitylation regulates RasGTPase signalling

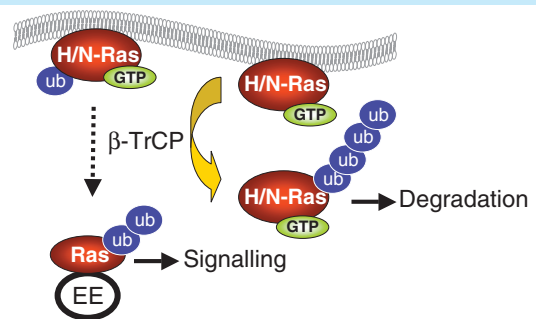

Regulation of RasGTPase signalling, such as its activation and subcellular targeting, shows many similarities with that of RhoGTPases (Fehrenbacher et al., 2009). The proto-oncogenic Ras GTPases H-Ras and N-Ras are subject to mono- and K63-linked di-ubiquitylation (Jura et al., 2006), which acts as a regulatory signal that triggers the internalisation of membrane-bound proteins towards endocytic compartments (Acconcia et al., 2009; Welchman et al., 2005). Because ubiquitylation of Ras is initiated by its activation and requires farnesylation or palmitoylation, Ras ubiquitylation probably occurs at the plasma membrane (Jura et al., 2006). As early endosomes (EEs) are derived from internalised plasma membrane domains, ubiquitylation of Ras could provide a molecular mechanism that drives the internalisation of activated N- and H-Ras (Figure). The removal of activated Ras from the plasma membrane suggests that ubiquitylation serves to downregulate Ras signalling. In agreement with this, ubiquitylation of Ras prevents uncontrolled Ras activation in *Drosophila* (Yan et al., 2009). Recently, the  $\beta$ -TrCP RING E3 ligase was found to drive polyubiquitylation and subsequent proteasomal degradation of H-Ras in HEK293 cells (Kim et al., 2009) (Figure). This pathway is reminiscent of the  $\beta$ -TrCP-mediated downregulation of  $\beta$ -catenin (Kim et al., 2009). Mutations in  $\beta$ -catenin have been implicated in the most common human malignant tumor, hepatocellular carcinoma (HCC) (Harada et al., 2004). Although mutations leading to constitutive activation of H-Ras are not sufficient to induce HCC, activating mutations in both  $\beta$ -catenin and H-Ras cause a 100% incidence of HCC in mice (Harada et al., 2004). Thus,  $\beta$ -TrCP-driven downregulation of Ras could act as a safety mechanism to avoid excessive activation of Ras during canonical Wnt signalling, preventing tumor development. Taken together, the ubiquitylation, internalisation and downregulation of activated Ras might serve to control the extent of Ras signalling, in addition to RasGAP-stimulated GTP hydrolysis.

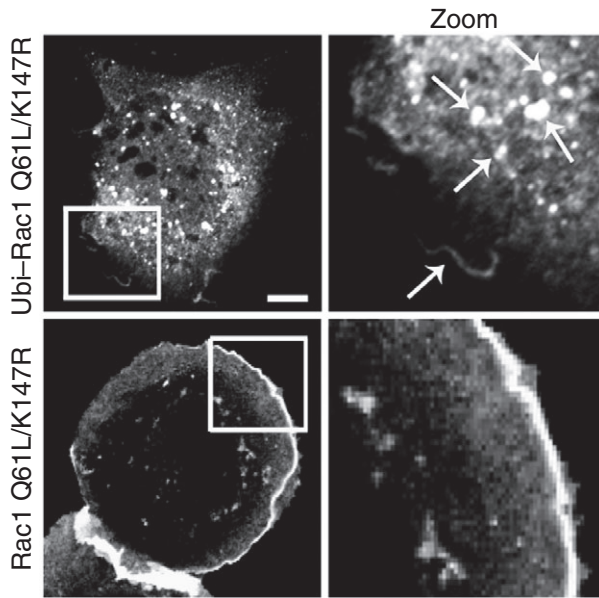

**Fig. 2. Fusion of ubiquitin with Rac1 relocates Rac1 towards endocytic vesicles.** Imaging of Rac1 Q61L/K147R and a Rac1 N-terminal fusion construct with ubiquitin (Ubi-Rac1 Q61L/K147R) by confocal microscopy in fixed HeLa cells showed significant accumulation of the ubiquitin-Rac1 fusion at endosomal structures, indicated by the arrows. Scale bar: 10  $\mu$ m. This localization is in marked contrast to the active Rac1 Q61L/K147R construct, which cannot be ubiquitylated and localises predominantly at the plasma membrane. This indicates that mono-ubiquitylation of Rac1 can regulate its subcellular targeting.

Cbl [Cas-Br-M (murine) ecotropic retroviral transforming sequence] (Sattler et al., 2002; Schmidt et al., 2006; Teckchandani et al., 2005) and the SCF( $\beta$ -TrCP)-E3 ligase complex (Boyer et al., 2004; Senadheera et al., 2001). However, none of these E3 ubiquitin ligases was shown to target Rac1 for ubiquitylation (Senadheera et al., 2001; Visvikis et al., 2008). Thus, the identification of the ubiquitin ligase for Rac1 remains a key objective for future research in this area.

### Cdc42

The RhoGTPase Cdc42 is best known for its induction of actin polymerisation and formation of filopodia, finger-like membrane protrusions. Cdc42 is, similar to RhoA and Rac1, susceptible to CNF1-mediated degradation (Doye et al., 2002), but the mechanism by which Cdc42 is targeted for ubiquitylation remains to be elucidated. Interestingly, Cdc42 prevents the proteasomal degradation of the epidermal growth factor (EGF) receptor by sequestering the RING E3 ligase Cbl (Feng et al., 2006; Hirsch et al., 2006; Wu et al., 2003). However, Cbl does not target Cdc42 for ubiquitylation, but regulates the ubiquitylation and degradation of the Cdc42 and Rac1 GEF  $\beta$ -Pix (Schmidt et al., 2006) (Fig. 4A). This is part of a negative feedback mechanism for EGF-induced signalling, as inactive Cdc42 fails to sequester Cbl, which allows Cbl-mediated degradation of the EGF receptor. For Cdc42, inhibition of its signalling by targeting a GEF appears an important pathway, as the ligase Smurf-1 (smad ubiquitin regulatory factor-1) can ubiquitylate the Cdc42 GEF hPEM-2, but not Cdc42 itself (Yamaguchi et al., 2008) (Fig. 4A). This suggests that Smurf-1, upon its recruitment by atypical protein kinase C zeta (PKC $\zeta$ ) into the Par6-Cdc42 polarity complex, facilitates the

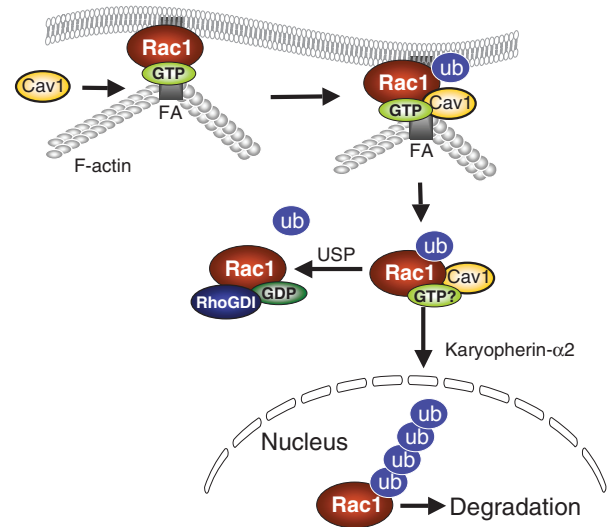

**Fig. 3. Schematic overview of Rac1 regulation by ubiquitylation.** Active Rac1 recruits Cav1 towards focal adhesions (FAs), clusters of ligand-bound integrins and associated proteins that concentrate at the end of F-actin stress fibers. Subsequent mono-ubiquitylation (ub) of Rac1 stimulates Rac1 internalisation in a Cav1-dependent fashion. Mono-ubiquitylated Rac1 can be either de-ubiquitylated by members of the USP family or poly-ubiquitylated followed by proteasomal degradation. Karyopherin- $\alpha$ 2 controls the poly-ubiquitylation and proteasomal degradation of Rac1 in the nucleus, and could therefore be required for the translocation of mono-ubiquitylated Rac1 into the nucleus.

degradation of active RhoA and also forms part of a negative feedback loop by inhibiting hPEM-2-mediated activation of Cdc42. Similarly, another E3 ligase, Cullin-1, which exists in a complex with Skp1 and Rbx-1, inhibits Cdc42 activation by targeting its GEFs, FGD1 and FGD3, for ubiquitylation (Hayakawa et al., 2005; Hayakawa et al., 2008). Thus, although the exact underlying mechanisms of UPS targeting of Cdc42 remain to be elucidated, a growing number of studies indicate that the UPS controls Cdc42 through regulating the available pool of Cdc42 GEFs (Fig. 4A).

### RhoA

UPS targeting and degradation of RhoA was first observed following CNF1-stimulated activation of RhoA, analogous to its regulation of Rac1 (Doye et al., 2002; Lerm et al., 2002; Schmidt et al., 1997). CNF1 induces proteasomal degradation of activated RhoA in different cell types, including 804G and HEK293 epithelial cells, NIH-3T3 fibroblasts, human endothelial cells, primary fibroblasts and macrophages (Boyer et al., 2006; Doye et al., 2002). In this respect, RhoA is regulated very differently compared with its close relative RhoB, which is primarily degraded by the lysosomal pathway (Adamson et al., 1992; Perez-Sala et al., 2009; Stamatakis et al., 2002).

Smurf-1, initially identified to control transforming growth factor  $\beta$  (TGF- $\beta$ ) signalling by targeting the SMAD family of transcriptional regulators for proteasomal degradation (Zhu et al., 1999), was the first E3 ligase found to target RhoA for ubiquitylation (Wang et al., 2003). Smurf-1 induces membrane protrusion, loss of actin stress fibres and reduced cell motility in Mv1Lu epithelial cells, HEK-3T3 cells and MDAMB-231 breast cancer cells, and induces enhanced neurite outgrowth in Neuro2a

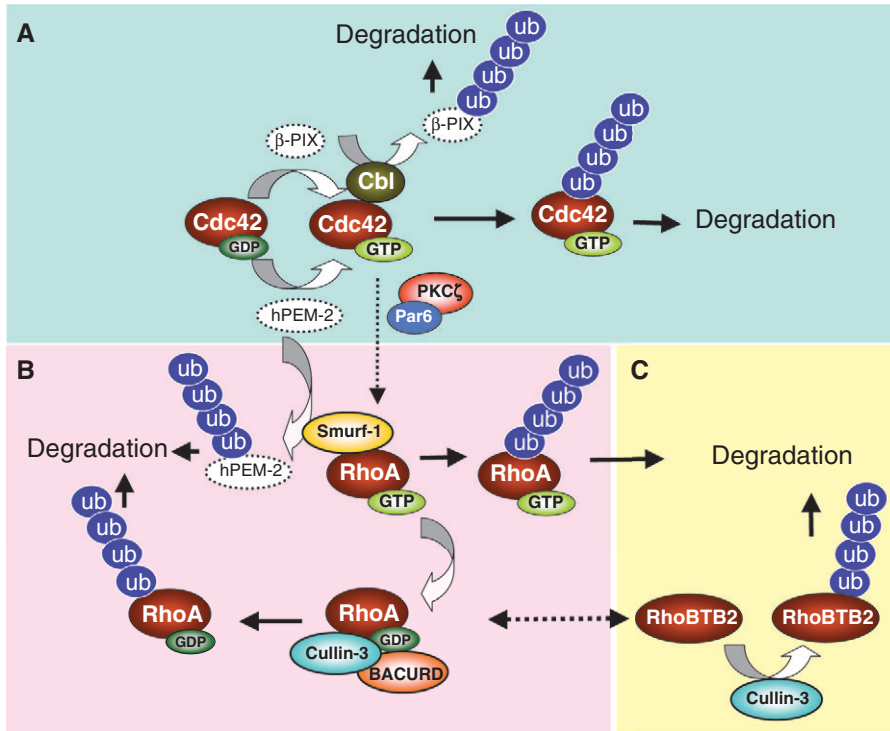

**Fig. 4. Overview of ubiquitin-mediated crosstalk between different RhoGTPases.** (A) The association of Cbl with active Cdc42 stimulates a negative feedback loop by initiating the ubiquitylation and proteasome-mediated degradation of the Cdc42GEF  $\beta$ -PIX. In addition, active Cdc42 itself is also susceptible to poly-ubiquitylation and proteasomal degradation, but the ubiquitin E3 ligases involved are unknown. (B) Recruitment of the HECT E3 ligase Smurf-1 by active Cdc42 in complex with Par6 and PKC $\zeta$  subsequently stimulates the local degradation of active RhoA. In parallel, this triggers a negative feedback loop as Smurf-1 poly-ubiquitylates the Cdc42GEF hPEM-2, driving its proteasomal degradation. In addition, inactive GDP-bound RhoA is targeted by BACURD, which promotes its Cullin-3-driven ubiquitylation and proteasomal degradation. (C) Similarly, Cullin-3 regulates the ubiquitylation and proteasomal degradation of RhoBTB2. Interestingly, RhoBTB2, like BACURD, contains a BTB region and might thus also bind to and act as a scaffold for Cullin-3, thereby regulating degradation of Cullin-3 substrates. As loss of the RhoBTB2 protein correlates with an increase in RhoA expression in several cancers, RhoBTB2 might well be involved in Cullin-3-driven ubiquitylation and proteasomal degradation of RhoA.

neuroblastoma cells, suggestive of inhibition of RhoA signalling (Bryan et al., 2005; Sahai et al., 2007; Wang et al., 2003). Smurf-1 appears to be RhoA specific, as it ubiquitylates RhoA, but not Rac1 or Cdc42. Moreover, Smurf-2, a Smurf-1 homologue, is incapable of ubiquitylating RhoA (Wang et al., 2003). Smurf-2 might even counteract Smurf-1, as it can induce Smurf-1 ubiquitylation and degradation (Fukunaga et al., 2008). Ubiquitylation by Smurf-1 is limited to activated RhoA, because genetic loss of Smurf-1 blocked proteasomal degradation of CNF1-activated RhoA in fibroblasts (Boyer et al., 2006) (Fig. 4B). In agreement with this, protein kinase A (PKA)-induced phosphorylation of RhoA at Ser188, which enhances RhoA inactivation through its association with RhoGDI, significantly impairs Smurf-1-mediated degradation of RhoA (Rolli-Derkinderen et al., 2005).

Interestingly, Smurf-1 ubiquitylation of RhoA is regulated by PKC $\zeta$ , which binds to and colocalises with Smurf-1 at membrane protrusions (Wang et al., 2003). PKC $\zeta$  is a key component of the Par6–Cdc42 polarity complex (Joberty et al., 2000; Suzuki et al., 2001; Yamanaka et al., 2001), which localises at the leading edge in migrating cells (Etienne-Manneville and Hall, 2001). PKC $\zeta$  has

been proposed to target Smurf-1 to the Par6–Cdc42 polarity complex, thereby stimulating local downregulation of RhoA signalling at the leading edge to promote cell motility (Sahai et al., 2007; Zhang et al., 2004) (Fig. 4B). In line with this model, Smurf-1 was found to associate with phosphorylated Par6 following TGF- $\beta$  stimulation of murine mammary gland cells, resulting in local degradation of RhoA, which is necessary to dissolve tight junctions during EMT (Ozdamar et al., 2005).

A second E3 ligase for RhoA is Cullin-3, which does not bear any resemblance to Smurf-1 (Chen et al., 2009). Cullin-3 belongs to the class of cullin proteins, which function as scaffolds in multiprotein cullin-ring ligases (CRLs) (Petroski and Deshaies, 2005). HeLa cells depleted of Cullin-3 show a remarkable increase in actin stress fibre formation, which was associated with an increase in RhoA protein levels. In line with this, Cullin-3 targets only GDP-bound RhoA for ubiquitylation, but not RhoB, RhoC, Cdc42 or Rac1 (Chen et al., 2009) (Fig. 4B). Thus, as well as its GTPase specificity, Cullin-3 stands out as it regulates inactive rather than active RhoA. Intriguingly, loss of Cullin-3 induces an increase both in the total pool of RhoA and in active, GTP-bound RhoA (Chen et al., 2009). Whether this is a consequence of an

**Table 1. Ubiquitylation of RhoGTPases**

| RhoGTPase | Ubiquitylation | Position  | E3 ligase            | References                                                                                                                                                                                                         |
|-----------|----------------|-----------|----------------------|--------------------------------------------------------------------------------------------------------------------------------------------------------------------------------------------------------------------|
| Rac1      | Mono and poly  | K147      | Not known            | (Doye et al., 2002; Esufali et al., 2007; Kovacic et al., 2001; Lanning et al., 2004; Lerm et al., 2002; Nethe et al., 2010; Sandrock et al., 2010; Visvikis et al., 2008)                                         |
| Rac1b     | Poly           | Not known | Not known            | (Visvikis et al., 2008)                                                                                                                                                                                            |
| Cdc42     | Poly           | Not known | Not known            | (Doye et al., 2002)                                                                                                                                                                                                |
| RhoA      | Poly           | K6 and K7 | Smurf-1 and Cullin-3 | (Boyer et al., 2006; Bryan et al., 2005; Chen et al., 2009; Doye et al., 2002; Ozdamar et al., 2005; Rolli-Derkinderen et al., 2005; Sahai et al., 2007; Wang et al., 2003; Wang et al., 2006; Zhang et al., 2004) |
| RhoB      | Poly           | Not known | Not known            | (Perez-Sala et al., 2009; Stamatakis et al., 2002)                                                                                                                                                                 |
| RhoBTB2   | Poly           | Not known | Cullin-3             | (Wilkins et al., 2004)                                                                                                                                                                                             |

increase in the amount of RhoA protein that is available for activation or whether it points to a role for Cullin-3 in regulating the balance between RhoA GEFs and GAPs remains to be established.

Cullin-3 recruits BTB (bric-à-brac, tramtrack, broad-complex) proteins, which act as scaffolds, recruiting substrates for ubiquitylation by CRLs (Petroski and Deshaies, 2005). Chen and colleagues (Chen et al., 2009) identified a BTB protein encoded by the gene CG10465 that facilitates RhoA targeting by Cullin-3; they named this protein BACURD for BTB-containing adaptor for Cullin-3-mediated RhoA degradation. The physiological relevance of Cullin-3- and BACURD-mediated degradation of RhoA is further underscored by the observation that depletion of Cullin-3 or BACURD impairs cell movement *in vitro* and *in vivo* (Chen et al., 2009).

The identification of the Smurf-1 and Cullin-3 E3 ligases, which do not show any structural homology and also target different forms of RhoA, underscores the complexity of UPS targeting of RhoA (Fig. 4B). As different E3 ligases can target RhoA for proteasomal degradation, it is thus tempting to speculate that, analogous to the role of different GEFs and GAPs in driving the spatio-temporal (in)activation of RhoA, the UPS might employ distinct E3 ligases to control the spatio-temporal degradation of RhoA.

### RhoBTB2

A number of RhoGTPases, such as RhoE and RhoH, exhibit rather poor intrinsic GTPase hydrolysis activity, and do not appear to be regulated by GEFs or GAPs. Insights into the regulation of these atypical RhoGTPases by the UPS (Aspenstrom et al., 2007; Chardin et al., 1993) are currently limited, but the association of the atypical RhoGTPase RhoBTB2 (Rho broad complex/tramtrack/bric-à-brac-2) with the RING ligase Cullin-3 (Aspenstrom et al., 2007; Wilkins et al., 2004) is of interest. The RhoGTPase subfamily of RhoBTBs comprises three members (RhoBTB1–3), of which RhoBTB2, also known as DBC2 (doubly deleted in breast cancer 2), is the best characterised (Aspenstrom et al., 2007). RhoBTB2 associates with *Drosophila* PakB and with mammalian Cullin-3 (de la Roche et al., 2005; Wilkins et al., 2004). Binding to Cullin-3 mediates RhoBTB2 ubiquitylation and leads to its downregulation in HeLa, 293T and SK-MES-1 cells (Wilkins et al., 2004) (Fig. 4C). Interestingly, reintroducing a RhoBTB2 mutant (Y284D) that is unable to bind Cullin-3 and therefore not susceptible to Cullin-3-mediated degradation cannot compensate for the loss of RhoBTB2. As BTB proteins, such as BACURD, mediate Cullin-3 target recognition (Chen et al., 2009), the failure of mutant RhoBTB2 (Y284D) to overcome the loss of RhoBTB2 suggests that RhoBTB2 acts as a scaffold protein and needs to associate with Cullin-3 to function. Because RhoBTB2 might be involved in determining Cullin-3 target specificity (Chen et al., 2009), it could play a role in the regulation of RhoA by Cullin-3 and in facilitating Cullin-3-dependent ubiquitylation of RhoA (Fig. 4C). Interestingly, breast, head and neck cancers show loss of RhoBTB2 protein and a concomitant increase in RhoA protein levels, which could lead to increased RhoA signalling (Abraham et al., 2001; Beder et al., 2006; Fritz et al., 1999; Hamaguchi et al., 2002).

### Crosstalk between the UPS and RhoGTPases by RhoGDI

There are three RhoGDI genes in mammals: RhoGDI $\alpha$ , RhoGDI $\beta$  (also known as Ly-GDI or D4-GDI) and RhoGDI $\gamma$ . Recent data

suggest that GDIs not only act as chaperones for inactive GTPases, but also regulate the expression of RhoGTPase proteins (Boulter et al., 2010; Ho et al., 2008). Ho and co-workers found that small interfering RNA (siRNA)-based silencing of RhoA and RhoC expression leads to the accumulation of RhoB protein in human adenocarcinoma cells, melanoma cells and primary human fibroblasts (Ho et al., 2008). As the number of RhoGDI molecules approximately equals the number of RhoGTPase molecules in the cell (Michaelson et al., 2001), reduced expression of RhoA and RhoC could result in enhanced binding of RhoGDI to RhoB, thus protecting it from degradation. This hypothesis was supported by the expression of RhoGDI $\alpha$ , which substantially increased the stability of RhoB (Ho et al., 2008).

A recent study by Boulter and co-workers showed that siRNA-induced depletion of RhoGDI $\alpha$  was found to reduce the expression of RhoA, RhoC, Rac1 and Cdc42, but not RhoB (Boulter et al., 2010). In a complementary set of experiments, overexpression of RhoGTPases was found to reduce the stability and activity of endogenous RhoGTPase proteins as a result of competitive binding to RhoGDI (Boulter et al., 2010). These findings indicate that association of RhoGDIs with RhoGTPases not only maintains them in an inactive state, but also protects them from degradation by the UPS. This is in good agreement with the general notion that activated GTPases are more susceptible to degradation than inactive GTPases (Jura et al., 2006; Kovacic et al., 2001; Schmidt et al., 1997; Visvikis et al., 2008). Finally, it is important to underscore the relevance of the analysis of endogenously expressed proteins in studies of ubiquitylation and protein stability. Although expression of GTPase mutants can be informative, the Boulter study shows that these might also indirectly affect the expression levels of the endogenous GTPases, potentially confounding experimental results.

### Concluding remarks

It has been over two decades since the identification of RhoGTPase-based signalling (Bosco et al., 2009; Didsbury et al., 1989; Hall, 1990; Kozma et al., 1997; Ridley et al., 1992; Ridley and Hall, 1992). During this period, work on the large number of GEFs and GAPs and on the role of RhoGDI has led to a widely accepted model in which GDP or GTP binding is a direct measure of the inactive or active state of a RhoGTPase. However, it has been questioned whether GTP hydrolysis alone is sufficient to block RhoGTPase signalling (Grizot et al., 2001; Illenberger et al., 1998; Neel et al., 2007). The UPS probably represents a parallel mechanism for inactivating RhoGTPases by targeting them for degradation. The more we appreciate the complexity of RhoGTPase regulation in time and space (Pertz, 2010), the more it becomes likely that additional mechanisms, such as the UPS discussed here, play a role through controlled degradation of either activated RhoGTPases or their regulators. In addition, ubiquitylation of RhoGTPases might mediate additional as yet unidentified protein interactions and so modify their subcellular localisation, further complicating the canonical cycling model (Fig. 1). Novel techniques, such as the fluorescence resonance energy transfer (FRET)-based detection of ubiquitylation (Batters et al., 2010; Ganesan et al., 2006), will be important to allow visualisation of protein-ubiquitin conjugation in live cells. Identification of the relevant E3 ligases at play, their target lysine residues, the type of ubiquitylation and its functional consequences are therefore obvious goals for future research, making analysis of RhoGTPase signalling all the more fascinating.

## References

- Abraham, M. T., Kuriakose, M. A., Sacks, P. G., Yee, H., Chiriboga, L., Bearer, E. L. and Delacure, M. D. (2001). Motility-related proteins as markers for head and neck squamous cell cancer. *Laryngoscope* **111**, 1285-1289.
- Acconcia, F., Sigismund, S. and Polo, S. (2009). Ubiquitin in trafficking: the network at work. *Exp. Cell Res.* **315**, 1610-1618.
- Adamson, P., Paterson, H. F. and Hall, A. (1992). Intracellular localization of the P21rho proteins. *J. Cell Biol.* **119**, 617-627.
- Alblas, J., Ulfman, L., Hordijk, P. and Koenderman, L. (2001). Activation of RhoA and ROCK are essential for detachment of migrating leukocytes. *Mol. Biol. Cell* **12**, 2137-2145.
- Aspenstrom, P., Ruusala, A. and Pacholsky, D. (2007). Taking Rho GTPases to the next level: the cellular functions of atypical Rho GTPases. *Exp. Cell Res.* **313**, 3673-3679.
- Batters, C., Zhu, H. and Sale, J. E. (2010). Visualisation of PCNA monoubiquitination in vivo by single pass spectral imaging FRET microscopy. *PLoS One* **5**, e9008.
- Beder, L. B., Gunduz, M., Ouchida, M., Gunduz, E., Sakai, A., Fukushima, K., Nagatsuka, H., Ito, S., Honjo, N., Nishizaki, K. et al. (2006). Identification of a candidate tumor suppressor gene RHOB1 located at a novel allelic loss region 10q21 in head and neck cancer. *J. Cancer Res. Clin. Oncol.* **132**, 19-27.
- Bishop, A. L. and Hall, A. (2000). Rho GTPases and their effector proteins. *Biochem. J.* **348**, 241-255.
- Bosco, E. E., Mulloy, J. C. and Zheng, Y. (2009). Rac1 GTPase: a "Rac" of all trades. *Cell. Mol. Life Sci.* **66**, 370-374.
- Boulter, E., Garcia-Mata, R., Guilluy, C., Dubash, A., Rossi, G., Brennwald, P. J. and Burridge, K. (2010). Regulation of Rho GTPase crosstalk, degradation and activity by RhoGDI1. *Nat. Cell Biol.* **12**, 477-483.
- Boyer, L., Travaglione, S., Fanzano, L., Gauthier, N. C., Popoff, M. R., Lemichez, E., Fiorentini, C. and Fabbri, A. (2004). Rac GTPase instructs nuclear factor-kappaB activation by conveying the SCF complex and Ikbalpha to the ruffling membranes. *Mol. Biol. Cell* **15**, 1124-1133.
- Boyer, L., Turchi, L., Desnues, B., Doye, A., Ponzio, G., Mege, J. L., Yamashita, M., Zhang, Y. E., Bertoglio, J., Flatau, G. et al. (2006). CNF1-induced ubiquitylation and proteasome destruction of activated RhoA is impaired in Smurf1<sup>-/-</sup> cells. *Mol. Biol. Cell* **17**, 2489-2497.
- Bryan, B., Cai, Y., Wrighton, K., Wu, G., Feng, X. H. and Liu, M. (2005). Ubiquitination of RhoA by Smurf1 promotes neurite outgrowth. *FEBS Lett.* **579**, 1015-1019.
- Chardin, P., Camonis, J. H., Gale, N. W., van Aelst, L., Schlessinger, J., Wigler, M. H. and Bar-Sagi, D. (1993). Human Sos1: a guanine nucleotide exchange factor for Ras that binds to GRB2. *Science* **260**, 1338-1343.
- Chen, Y., Yang, Z., Meng, M., Zhao, Y., Dong, N., Yan, H., Liu, L., Ding, M., Peng, H. B. and Shao, F. (2009). Cullin mediates degradation of RhoA through evolutionarily conserved BTB adaptors to control actin cytoskeleton structure and cell movement. *Mol. Cell* **35**, 841-855.
- de la Roche, M., Mahasneh, A., Lee, S. F., Rivero, F. and Cote, G. P. (2005). Cellular distribution and functions of wild-type and constitutively activated Dictyostelium PakB. *Mol. Biol. Cell* **16**, 238-247.
- del Pozo, M. A., Alderson, N. B., Kiosses, W. B., Chiang, H. H., Anderson, R. G. and Schwartz, M. A. (2004). Integrins regulate Rac targeting by internalization of membrane domains. *Science* **303**, 839-842.
- Deshaies, R. J. and Joazeiro, C. A. (2009). RING domain E3 ubiquitin ligases. *Annu. Rev. Biochem.* **78**, 399-434.
- Didsbury, J., Weber, R. F., Bokoch, G. M., Evans, T. and Snyderman, R. (1989). rac, a novel ras-related family of proteins that are botulinum toxin substrates. *J. Biol. Chem.* **264**, 16378-16382.
- Doye, A., Mettouchi, A., Bossis, G., Clement, R., Buisson-Touati, C., Flatau, G., Gagnoux, L., Piechaczyk, M., Boquet, P. and Lemichez, E. (2002). CNF1 exploits the ubiquitin-proteasome machinery to restrict Rho GTPase activation for bacterial host cell invasion. *Cell* **111**, 553-564.
- Ezufali, S., Charames, G. S. and Bapat, B. (2007). Suppression of nuclear Wnt signaling leads to stabilization of Rac1 isoforms. *FEBS Lett.* **581**, 4850-4856.
- Etienne-Manneville, S. and Hall, A. (2001). Integrin-mediated activation of Cdc42 controls cell polarity in migrating astrocytes through PKCzeta. *Cell* **106**, 489-498.
- Fehrenbacher, N., Bar-Sagi, D. and Philips, M. (2009). Ras/MAPK signaling from endomembranes. *Mol. Oncol.* **3**, 297-307.
- Feng, Q., Baird, D., Peng, X., Wang, J., Ly, T., Guan, J. L. and Cerione, R. A. (2006). Cool-1 functions as an essential regulatory node for EGF receptor- and Src-mediated cell growth. *Nat. Cell Biol.* **8**, 945-956.
- Fernandez-Borja, M., Janssen, L., Verwoerd, D., Hordijk, P. and Neeffjes, J. (2005). RhoB regulates endosome transport by promoting actin assembly on endosomal membranes through Dial1. *J. Cell Sci.* **118**, 2661-2670.
- Fritz, G., Just, I. and Kaina, B. (1999). Rho GTPases are over-expressed in human tumors. *Int. J. Cancer* **81**, 682-687.
- Fukunaga, E., Inoue, Y., Komiya, S., Horiguchi, K., Goto, K., Saitoh, M., Miyazawa, K., Koizuma, D., Hanyu, A. and Imamura, T. (2008). Smurf2 induces ubiquitin-dependent degradation of Smurf1 to prevent migration of breast cancer cells. *J. Biol. Chem.* **283**, 35660-35667.
- Ganesan, S., Ameer-Beg, S. M., Ng, T. T., Vojnovic, B. and Wouters, F. S. (2006). A dark yellow fluorescent protein (YFP)-based Resonance Energy-Accepting Chromoprotein (REACH) for Förster resonance energy transfer with GFP. *Proc. Natl. Acad. Sci. USA* **103**, 4089-4094.
- Grizot, S., Faure, J., Fieschi, F., Vignais, P. V., Dagher, M. C. and Pebay-Peyroula, E. (2001). Crystal structure of the Rac1-RhoGDI complex involved in NADPH oxidase activation. *Biochemistry* **40**, 10007-10013.
- Haglund, K., Sigismund, S., Polo, S., Szymkiewicz, I., Di Fiore, P. P. and Dikic, I. (2003). Multiple monoubiquitination of RTKs is sufficient for their endocytosis and degradation. *Nat. Cell Biol.* **5**, 461-466.
- Hall, A. (1990). The cellular functions of small GTP-binding proteins. *Science* **249**, 635-640.
- Hamaguchi, M., Meth, J. L., von Klitzing, C., Wei, W., Esposito, D., Rodgers, L., Walsh, T., Welch, P., King, M. C. and Wigler, M. H. (2002). DBC2, a candidate for a tumor suppressor gene involved in breast cancer. *Proc. Natl. Acad. Sci. USA* **99**, 13647-13652.
- Harada, N., Oshima, H., Katoh, M., Tamai, Y., Oshima, M. and Taketo, M. M. (2004). Hepatocarcinogenesis in mice with beta-catenin and Ha-ras gene mutations. *Cancer Res.* **64**, 48-54.
- Hayakawa, M., Kitagawa, H., Miyazawa, K., Kitagawa, M. and Kikugawa, K. (2005). The FWD1/beta-TrCP-mediated degradation pathway establishes a 'turning off switch' of a Cdc42 guanine nucleotide exchange factor, FGD1. *Genes Cells* **10**, 241-251.
- Hayakawa, M., Matsushima, M., Hagiwara, H., Oshima, T., Fujino, T., Ando, K., Kikugawa, K., Tanaka, H., Miyazawa, K. and Kitagawa, M. (2008). Novel insights into FGD3, a putative GEF for Cdc42, that undergoes SCF(FWD1/beta-TrCP)-mediated proteasomal degradation analogous to that of its homologue FGD1 but regulates cell morphology and motility differently from FGD1. *Genes Cells* **13**, 329-342.
- Hirsch, D. S., Shen, Y. and Wu, W. J. (2006). Growth and motility inhibition of breast cancer cells by epidermal growth factor receptor degradation is correlated with inactivation of Cdc42. *Cancer Res.* **66**, 3523-3530.
- Ho, T. T., Merajver, S. D., Lapierre, C. M., Nusgens, B. V. and Deroanne, C. F. (2008). RhoA-GDP regulates RhoB protein stability. Potential involvement of RhoGDIalpha. *J. Biol. Chem.* **283**, 21588-21598.
- Holler, D. and Dikic, I. (2004). Receptor endocytosis via ubiquitin-dependent and -independent pathways. *Biochem. Pharmacol.* **67**, 1013-1017.
- Hordijk, P. L., ten Klooster, J. P., van der Kammen, R. A., Michiels, F., Oomen, L. C. and Collard, J. G. (1997). Inhibition of invasion of epithelial cells by Tiam1-Rac signaling. *Science* **278**, 1464-1466.
- Huibregtse, J. M., Scheffner, M., Beaudenon, S. and Howley, P. M. (1995). A family of proteins structurally and functionally related to the E6-AP ubiquitin-protein ligase. *Proc. Natl. Acad. Sci. USA* **92**, 2563-2567.
- Illenberger, D., Schwald, F., Pimmer, D., Binder, W., Maier, G., Dietrich, A. and Gierschik, P. (1998). Stimulation of phospholipase C-beta2 by the Rho GTPases Cdc42Hs and Rac1. *EMBO J.* **17**, 6241-6249.
- Insall, R. H. and Machesky, L. M. (2009). Actin dynamics at the leading edge: from simple machinery to complex networks. *Dev. Cell* **17**, 310-322.
- Joberty, G., Petersen, C., Gao, L. and Macara, I. G. (2000). The cell-polarity protein Par6 links Par3 and atypical protein kinase C to Cdc42. *Nat. Cell Biol.* **2**, 531-539.
- Jura, N., Scotto-Lavino, E., Sobczyk, A. and Bar-Sagi, D. (2006). Differential modification of Ras proteins by ubiquitination. *Mol. Cell* **21**, 679-687.
- Kim, G. H., Park, E., Kong, Y. Y. and Han, J. K. (2006). Novel function of POSH, a JNK scaffold, as an E3 ubiquitin ligase for the Hrs stability on early endosomes. *Cell Signal.* **18**, 553-563.
- Kim, S. E., Yoon, J. Y., Jeong, W. J., Jeon, S. H., Park, Y., Yoon, J. B., Park, Y. N., Kim, H. and Choi, K. Y. (2009). H-Ras is degraded by Wnt/beta-catenin signaling via beta-TrCP-mediated polyubiquitylation. *J. Cell Sci.* **122**, 842-848.
- Kovacic, H. N., Irani, K. and Goldschmidt-Clermont, P. J. (2001). Redox regulation of human Rac1 stability by the proteasome in human aortic endothelial cells. *J. Biol. Chem.* **276**, 45856-45861.
- Kozma, R., Sarner, S., Ahmed, S. and Lim, L. (1997). Rho family GTPases and neuronal growth cone remodelling: relationship between increased complexity induced by Cdc42Hs, Rac1, and acetylcholine and collapse induced by RhoA and lysophosphatidic acid. *Mol. Cell Biol.* **17**, 1201-1211.
- Lanning, C. C., Daddona, J. L., Ruiz-Velasco, R., Shafer, S. H. and Williams, C. L. (2004). The Rac1 C-terminal polybasic region regulates the nuclear localization and protein degradation of Rac1. *J. Biol. Chem.* **279**, 44197-44210.
- Lerm, M., Schmidt, G., Goehring, U. M., Schirmer, J. and Aktories, K. (1999). Identification of the region of rho involved in substrate recognition by Escherichia coli cytotoxic necrotizing factor 1 (CNF1). *J. Biol. Chem.* **274**, 28999-29004.
- Lerm, M., Pop, M., Fritz, G., Aktories, K. and Schmidt, G. (2002). Proteasomal degradation of cytotoxic necrotizing factor 1-activated rac. *Infect. Immunol.* **70**, 4053-4058.
- Li, W., Bengtson, M. H., Ulbrich, A., Matsuda, A., Reddy, V. A., Orth, A., Chanda, S. K., Batalov, S. and Joazeiro, C. A. (2008). Genome-wide and functional annotation of human E3 ubiquitin ligases identifies MULAN, a mitochondrial E3 that regulates the organelle's dynamics and signaling. *PLoS ONE* **3**, e1487.
- Lynch, E. A., Stall, J., Schmidt, G., Chavrier, P. and D'Souza-Schorey, C. (2006). Proteasome-mediated degradation of Rac1-GTP during epithelial cell scattering. *Mol. Biol. Cell* **17**, 2236-2242.
- Michaelson, D., Silletti, J., Murphy, G., D'Eustachio, P., Rush, M. and Philips, M. R. (2001). Differential localization of Rho GTPases in live cells: regulation by hypervariable regions and RhoGDI binding. *J. Cell Biol.* **152**, 111-126.
- Neel, N. F., Lapierre, L. A., Goldenring, J. R. and Richmond, A. (2007). RhoB plays an essential role in CXCR2 sorting decisions. *J. Cell Sci.* **120**, 1559-1571.
- Nethe, M., Anthony, E. C., Fernandez-Borja, M., Dee, R., Geerts, D., Hensbergen, P. J., Deelder, A. M., Schmidt, G. and Hordijk, P. L. (2010). Focal-adhesion targeting links caveolin-1 to a Rac1-degradation pathway. *J. Cell Sci.* **123**, 1948-1958.
- Ozdamar, B., Bose, R., Barrios-Rodiles, M., Wang, H. R., Zhang, Y. and Wrana, J. L. (2005). Regulation of the polarity protein Par6 by TGFbeta receptors controls epithelial cell plasticity. *Science* **307**, 1603-1609.

- Palamidessi, A., Frittoli, E., Garre, M., Faretta, M., Mione, M., Testa, I., Diaspro, A., Lanzetti, L., Scita, G. and Di Fiore, P. P. (2008). Endocytic trafficking of Rac is required for the spatial restriction of signaling in cell migration. *Cell* **134**, 135-147.
- Perez-Moreno, M., Jamora, C. and Fuchs, E. (2003). Sticky business: orchestrating cellular signals at adherens junctions. *Cell* **112**, 535-548.
- Perez-Sala, D., Boya, P., Ramos, I., Herrera, M. and Stamatakis, K. (2009). The C-terminal sequence of RhoB directs protein degradation through an endo-lysosomal pathway. *PLoS ONE* **4**, e8117.
- Pertze, O. (2010). Spatio-temporal Rho GTPase signaling-where are we now? *J. Cell Sci.* **123**, 1841-1850.
- Petroski, M. D. and Deshaies, R. J. (2005). Function and regulation of cullin-RING ubiquitin ligases. *Nat. Rev. Mol. Cell Biol.* **6**, 9-20.
- Polo, S., Sigismund, S., Faretta, M., Guidi, M., Capua, M. R., Bossi, G., Chen, H., De Camilli, P. and Di Fiore, P. P. (2002). A single motif responsible for ubiquitin recognition and monoubiquitination in endocytic proteins. *Nature* **416**, 451-455.
- Pop, M., Aktories, K. and Schmidt, G. (2004). Isotype-specific degradation of Rac activated by the cytotoxic necrotizing factor 1. *J. Biol. Chem.* **279**, 35840-35848.
- Ridley, A. J. and Hall, A. (1992). The small GTP-binding protein rho regulates the assembly of focal adhesions and actin stress fibers in response to growth factors. *Cell* **70**, 389-399.
- Ridley, A. J., Paterson, H. F., Johnston, C. L., Diekmann, D. and Hall, A. (1992). The small GTP-binding protein rac regulates growth factor-induced membrane ruffling. *Cell* **70**, 401-410.
- Rolli-Derkinderen, M., Sauzeau, V., Boyer, L., Lemichez, E., Baron, C., Henrion, D., Loirand, G. and Pacaud, P. (2005). Phosphorylation of serine 188 protects RhoA from ubiquitin/proteasome-mediated degradation in vascular smooth muscle cells. *Circ. Res.* **96**, 1152-1160.
- Rossman, K. L., Der, C. J. and Sondek, J. (2005). GEF means go: turning on RHO GTPases with guanine nucleotide-exchange factors. *Nat. Rev. Mol. Cell Biol.* **6**, 167-180.
- Rotin, D. and Kumar, S. (2009). Physiological functions of the HECT family of ubiquitin ligases. *Nat. Rev. Mol. Cell Biol.* **10**, 398-409.
- Sahai, E., Garcia-Medina, R., Pouyssegur, J. and Vial, E. (2007). Smurf1 regulates tumor cell plasticity and motility through degradation of RhoA leading to localized inhibition of contractility. *J. Cell Biol.* **176**, 35-42.
- Sandrock, K., Bielek, H., Schradi, K., Schmidt, G. and Klugbauer, N. (2010). The nuclear import of the small GTPase Rac1 is mediated by the direct interaction with karyopherin alpha2. *Traffic* **11**, 198-209.
- Sattler, M., Pride, Y. B., Quinlan, L. R., Verma, S., Malouf, N. A., Husson, H., Salgia, R., Lipkowitz, S. and Griffin, J. D. (2002). Differential expression and signaling of CBL and CBL-B in BCR/ABL transformed cells. *Oncogene* **21**, 1423-1433.
- Schmidt, G., Sehr, P., Wilm, M., Selzer, J., Mann, M. and Aktories, K. (1997). Gln 63 of Rho is deamidated by Escherichia coli cytotoxic necrotizing factor-1. *Nature* **387**, 725-729.
- Schmidt, M. H., Husnjak, K., Szymkiewicz, I., Haglund, K. and Dikic, I. (2006). Cbl escapes Cdc42-mediated inhibition by downregulation of the adaptor molecule betaPix. *Oncogene* **25**, 3071-3078.
- Senadheera, D., Haataja, L., Groffen, J. and Heisterkamp, N. (2001). The small GTPase Rac interacts with ubiquitination complex proteins Cullin-1 and CDC23. *Int. J. Mol. Med.* **8**, 127-133.
- Sowa, M. E., Bennett, E. J., Gygi, S. P. and Harper, J. W. (2009). Defining the human deubiquitinating enzyme interaction landscape. *Cell* **138**, 389-403.
- Stamatikis, K., Cernuda-Morollon, E., Hernandez-Perera, O. and Perez-Sala, D. (2002). Isoprenylation of RhoB is necessary for its degradation. A novel determinant in the complex regulation of RhoB expression by the mevalonate pathway. *J. Biol. Chem.* **277**, 49389-49396.
- Stamenova, S. D., French, M. E., He, Y., Francis, S. A., Kramer, Z. B. and Hicke, L. (2007). Ubiquitin binds to and regulates a subset of SH3 domains. *Mol. Cell* **25**, 273-284.
- Suzuki, A., Yamanaka, T., Hirose, T., Manabe, N., Mizuno, K., Shimizu, M., Akimoto, K., Izumi, Y., Ohnishi, T. and Ohno, S. (2001). Atypical protein kinase C is involved in the evolutionarily conserved par protein complex and plays a critical role in establishing epithelia-specific junctional structures. *J. Cell Biol.* **152**, 1183-1196.
- Teekchandani, A. M., Panetti, T. S. and Tsygankov, A. Y. (2005). c-Cbl regulates migration of v-Abl-transformed NIH 3T3 fibroblasts via Rac1. *Exp. Cell Res.* **307**, 247-258.
- ten Klooster, J. P., Jaffer, Z. M., Chernoff, J. and Hordijk, P. L. (2006). Targeting and activation of Rac1 are mediated by the exchange factor beta-Pix. *J. Cell Biol.* **172**, 759-769.
- van Aelst, L. and D'Souza-Schorey, C. (1997). Rho GTPases and signaling networks. *Genes Dev.* **11**, 2295-2322.
- van Duijn, T. J., Anthony, E. C., Hensbergen, P. J., Deelder, A. M. and Hordijk, P. L. (2010). Rac1 recruits the adapter protein CMS/CD2AP to cell-cell contacts. *J. Biol. Chem.* **285**, 20137-20146.
- van Hennik, P. B., ten Klooster, J. P., Halstead, J. R., Voermans, C., Anthony, E. C., Divecha, N. and Hordijk, P. L. (2003). The C-terminal domain of Rac1 contains two motifs that control targeting and signaling specificity. *J. Biol. Chem.* **278**, 39166-39175.
- Visvikis, O., Lores, P., Boyer, L., Chardin, P., Lemichez, E. and Gacon, G. (2008). Activated Rac1, but not the tumorigenic variant Rac1b, is ubiquitinated on Lys 147 through a JNK-regulated process. *FEBS J.* **275**, 386-396.
- Wang, H. R., Zhang, Y., Ozdamar, B., Ogunjimi, A. A., Alexandrova, E., Thomsen, G. H. and Wrana, J. L. (2003). Regulation of cell polarity and protrusion formation by targeting RhoA for degradation. *Science* **302**, 1775-1779.
- Wang, M., Cheng, D., Peng, J. and Pickart, C. M. (2006). Molecular determinants of polyubiquitin linkage selection by an HECT ubiquitin ligase. *EMBO J.* **25**, 1710-1719.
- Welchman, R. L., Gordon, C. and Mayer, R. J. (2005). Ubiquitin and ubiquitin-like proteins as multifunctional signals. *Nat. Rev. Mol. Cell Biol.* **6**, 599-609.
- Wherlock, M., Gampel, A., Futter, C. and Mellor, H. (2004). Farnesyltransferase inhibitors disrupt EGF receptor traffic through modulation of the RhoB GTPase. *J. Cell Sci.* **117**, 3221-3231.
- Wilkins, A., Ping, Q. and Carpenter, C. L. (2004). RhoBTB2 is a substrate of the mammalian Cul3 ubiquitin ligase complex. *Genes Dev.* **18**, 856-861.
- Williams, C. L. (2003). The polybasic region of Ras and Rho family small GTPases: a regulator of protein interactions and membrane association and a site of nuclear localization signal sequences. *Cell Signal.* **15**, 1071-1080.
- Worthylake, R. A. and Burridge, K. (2001). Leukocyte transendothelial migration: orchestrating the underlying molecular machinery. *Curr. Opin. Cell Biol.* **13**, 569-577.
- Wu, W. J., Tu, S. and Cerione, R. A. (2003). Activated Cdc42 sequesters c-Cbl and prevents EGF receptor degradation. *Cell* **114**, 715-725.
- Xu, P., Duong, D. M., Seyfried, N. T., Cheng, D., Xie, Y., Robert, J., Rush, J., Hochstrasser, M., Finley, D. and Peng, J. (2009). Quantitative proteomics reveals the function of unconventional ubiquitin chains in proteasomal degradation. *Cell* **137**, 133-145.
- Yamaguchi, K., Ohara, O., Ando, A. and Nagase, T. (2008). Smurf1 directly targets hPEM-2, a GEF for Cdc42, via a novel combination of protein interaction modules in the ubiquitin-proteasome pathway. *Biol. Chem.* **389**, 405-413.
- Yamanaka, T., Horikoshi, Y., Suzuki, A., Sugiyama, Y., Kitamura, K., Maniwa, R., Nagai, Y., Yamashita, A., Hirose, T., Ishikawa, H. et al. (2001). PAR-6 regulates aPKC activity in a novel way and mediates cell-cell contact-induced formation of the epithelial junctional complex. *Genes Cells* **6**, 721-731.
- Yan, H., Chin, M. L., Horvath, E. A., Kane, E. A. and Pflieger, C. M. (2009). Impairment of ubiquitylation by mutation in Drosophila E1 promotes both cell-autonomous and non-cell-autonomous Ras-ERK activation in vivo. *J. Cell Sci.* **122**, 1461-1470.
- Zhang, Y., Wang, H. R. and Wrana, J. L. (2004). Smurf1: a link between cell polarity and ubiquitination. *Cell Cycle* **3**, 391-392.
- Zhu, H., Kavsak, P., Abdollah, S., Wrana, J. L. and Thomsen, G. H. (1999). A SMAD ubiquitin ligase targets the BMP pathway and affects embryonic pattern formation. *Nature* **400**, 687-693.
